# Supplementary material for: Data extraction from electronic health records (EHRs) for quality measurement of the physical therapy process: comparison between EHR data and survey data
Source: PubMed Central journal article supplement (PMC5101697; doi:10.1186/s12911-016-0382-4), 2016-11-08
Supplement: 12911_2016_382_MOESM2_ESM.pdf [file 12911_2016_382_MOESM2_ESM.pdf]

Table A1. Multilevel regression on 4 indicators with characteristics on three levels, i.e. patient, therapist and practice

|                                               | Indicator 1           | Indicator 2           | Indicator 3           | Indicator 8           |
|-----------------------------------------------|-----------------------|-----------------------|-----------------------|-----------------------|
| <b>Patient characteristics:</b>               |                       |                       |                       |                       |
| Chronic patient (ref. acute patient)          | -0.004 (0.003)        | -0.001 (0.001)        | <b>0.004 (0.001)</b>  | <b>0.011 (0.004)</b>  |
| Direct access patient (ref. referred patient) | n.a.*                 | n.a.*                 | <b>-0.005 (0.001)</b> | <b>-0.038 (0.003)</b> |
| Male (ref. female)                            | -0.000 (0.001)        | -0.000 (0.001)        | -0.001 (0.001)        | -0.000 (0.002)        |
| Age                                           | 0.000 (0.000)         | -0.000 (0.000)        | -0.000 (0.000)        | 0.000 (0.000)         |
| EHR (ref. survey)                             | <b>-0.024 (0.002)</b> | <b>-0.035 (0.001)</b> | <b>0.022 (0.001)</b>  | -0.003 (0.003)        |
| <b>Therapist characteristics:</b>             |                       |                       |                       |                       |
| Male (ref. female)                            | -0.002 (0.002)        | 0.000 (0.002)         | -0.004 (0.003)        | -0.003 (0.005)        |
| Age                                           | -0.001 (0.000)        | -0.000 (0.000)        | 0.000 (0.000)         | 0.000 (0.000)         |
| <b>Practice characteristics:</b>              |                       |                       |                       |                       |
| Practice size >1 (ref. practice size =1)      | 0.000 (0.000)         | -0.000 (0.000)        | 0.000 (0.000)         | 0.000 (0.000)         |

\*n.a. = not applicable as indicator 1 is only for direct access patients and indicator 2 is only for referred patients

**Bold:** p<0.001
